# Supplementary material for: Manganese(iii) meso-tetrakis(ortho-N-alkylpyridyl)porphyrins. Synthesis, characterization, and catalysis of O2˙− dismutation
Source: Royal Society of Chemistry journal article supplement (doi:10.1039/b201057g), 2002-01-01
Supplement: b201057g.doc [file b201057g.doc]

**Manganese (III) *Meso* Tetrakis *Ortho* *N*-alkylpyridylporphyrins. Synthesis, Characterization, and Catalysis of O2.- Dismutation**

By

Ines Batinic-Haberle,1* Ivan Spasojevic,1 Robert. D. Stevens,2 Peter Hambright,3 and Irwin Fridovich1

1Department of Biochemistry, and 2Department of Pediatrics, Duke University Medical Center, Durham, NC 27710, 3Department of Chemistry, Howard University, Washington, D. C. 20059.

*To whom correspondence should be addressed

e-mail: ines@chem.duke.edu

Tel: 919-684-2101

Fax: 919-684-8885

**Figure S1.** Cyclic voltammetry of 0.5 mM MnIIITE-2-PyP5+ and MnIIITnHex-2-PyP5+ porphyrins in a 0.05 M phosphate buffer (pH 7.8, 0.1 M NaCl) at a scan rate of 0.1 V/s.

**Figure S2.** Electrospray mass spectrometry of 0.5 mM solutions of H2T(alkyl)2-PyP4+ compounds in 1:1 water : acetonitrile at a cone voltage of 20 V.

**Figure S3.** Electrospray mass spectrometry of 0.5 mM solutions of MnIIIT(alkyl)2-PyP5+ compounds in 1:1 water : acetonitrile at a cone voltage of 20 V.

**Figure S1**-IBH-Dalton-04-02

**Figure S2**-IBH-Dalton-04-02

H2TnBu-2-PyP4+

H2TE-2-PyP4+

H2TnPr-2-PyP4+

H2TnHex-2-PyP4+

H2TM-2-PyP4+

H2TnOct-2-PyP4+

**Figure S3**-IBH-Dalton-04-02

MnIIITM-2-PyP5+

MnIIITE-2-PyP5+

MnIIITnPr-2-PyP5+

MnIIITnBu-2-PyP5+

MnIIITnHex-2-PyP5+

MnIIITnOct-2-PyP5+
